# Supplementary material for: Group hunting within the Carnivora: physiological, cognitive and environmental influences on strategy and cooperation
Source: Springer Nature journal article supplement (doi:10.1007/s00265-012-1423-3), 2012-10-10
Supplement: 265_2012_1423_MOESM1_ESM.pdf [file 265_2012_1423_MOESM1_ESM.pdf]

## Group hunting within the Carnivora: physiological, cognitive and environmental influences on strategy and cooperation

Authors: Ida Bailey, Julia P Myatt and Alan M Wilson

Structure and Motion Lab., The Royal Veterinary College, Hatfield, Herts, AL9 7TA

Corresponding author: Dr Ida Bailey, e-mail: [ieb3@standrews.ac.uk](mailto:ieb3@standrews.ac.uk)

Current addresses: School of Biology, University of St Andrews, St. Mary's College South Street, St. Andrews, Fife, Scotland, KY16 9JP

**Online Resource 1:** A summary of non-carnivoran species for which there are published accounts of intraspecific cooperative hunting of a target prey individual by two or more hunters. This is not an exhaustive list and does not include anecdotal/unpublished accounts that exist for additional species.

| Order                           | Family                                        | Common name                      | Latin name                         | Example Reference(s)                        |
|---------------------------------|-----------------------------------------------|----------------------------------|------------------------------------|---------------------------------------------|
| Aves                            | Corvidae<br>Corvids                           | Brown-Necked Raven               | <i>Corvus ruficollis</i>           | (Yosef and Yosef 2010b)                     |
|                                 |                                               | Common Raven                     | <i>Corvus corax</i>                | (Hendricks and Schlang 1998)                |
|                                 |                                               | Florida Scrub-Jays               | <i>Aphelocoma coerulescens</i>     | (Bowman 2003)                               |
|                                 |                                               | American Crows                   | <i>Corvus brachyrhynchos</i>       | (Lefevre 2005)                              |
|                                 | Laniidae<br>Shrikes                           | Northern Shrikes                 | <i>Lanius excubitor invictus</i>   | (Hannah 2005)                               |
|                                 |                                               | Loggerhead Shrikes               | <i>Lanius ludovicianus</i>         | (Frye and Gerhardt 2001)                    |
|                                 | Falconidae<br>Falcons                         | Peregrine Falcons                | <i>Falco peregrines</i>            | (Ellis 2006)                                |
|                                 |                                               | Black Falcon                     | <i>Falco subniger</i>              | (Hollands 2003)                             |
|                                 |                                               | Brown Falcon                     | <i>Falco berigora</i>              | (Mooney 1989)                               |
|                                 |                                               | Grey Falcon                      | <i>Falco hypoleucos</i>            | (Czechura and Debus 1985)                   |
|                                 |                                               | Red-necked Falcon                | <i>Falco chicquera</i>             | (Malan 1991)                                |
|                                 |                                               | Aplomado Falcon                  | <i>Falco femoralis</i>             | (Brown et al. 2004)                         |
|                                 |                                               | Lanner Falcon                    | <i>Falco biarmicus</i>             | (Leonardi 1999)                             |
|                                 |                                               | Taita Falcons                    | <i>Falco fasciinucha</i>           | (Hartley et al. 1993)                       |
|                                 |                                               | Hobbies                          | <i>Falco subbuteo</i>              | (Poot 1991)                                 |
|                                 |                                               | Merlin                           | <i>Falco columbarius</i>           | (Buchanan 2010)                             |
|                                 |                                               | Saker Falcon                     | <i>Falco cherrug</i>               | (Eakle et al. 2004)                         |
|                                 | Accipitrinae<br>True Hawks                    | Harris Hawk,                     | <i>Parabuteo unicinctus</i>        | (Bednarz 1988)                              |
|                                 | Accipitridae<br>Harriers, Eagles,<br>Buzzards | Northern Harriers                | <i>Circus Cyaneus</i>              | (Bosakowski and Smiths 1996)                |
|                                 |                                               | White tailed eagle               | <i>Haliaeetus albicilla</i>        | (Karlsson 1975)                             |
|                                 |                                               | Golden eagle                     | <i>Aquila chrysaetos</i>           | (Buhler et al. 2000)                        |
|                                 |                                               | Bald eagle                       | <i>Haliaeetus leucocephalus</i>    | (Folk 1992)                                 |
|                                 |                                               | Bonelli's eagle                  | <i>Hieraaetus fasciatus</i>        | (Beven 1976)                                |
| Stercorariidae<br>Skuas         | Subantarctic skua                             | <i>Catharacta skua lonnbergi</i> | (Schulz 2004)                      |                                             |
|                                 | Parasitic Jaegers                             | <i>Stercorarius parasiticus</i>  | (Belisle and Giroux 1995)          |                                             |
| Pelecanidae<br>Pelicans         | American white pelicans                       | <i>Pelecanus erythrorhynchos</i> | (McMahon and Evans 1992)n          |                                             |
| Anatidae<br>Ducks, Geese, Swans | Red-breasted Merganser                        | <i>Mergus serrator</i>           | (Deslauri.Jr and Brattstr.Bh 1965) |                                             |
| Cetacea                         | Delphinidae<br>Dolphins                       | Killer whale                     | <i>Orcinus orca</i>                | (Baird 2000)<br>(Van Opzeeland et al. 2005) |
|                                 |                                               | Commerson's dolphin              | <i>Cephalorhynchus commersonii</i> | (Coscarella et al.)                         |
|                                 |                                               | Atlantic white-sided dolphin     | <i>Lagenorhynchus acutus</i>       | (Weinrich et al. 2001)                      |
|                                 |                                               | Spinner dolphins                 | <i>Stenella longirostris</i>       | (Benoit-Bird and Au 2009)                   |
|                                 |                                               | Bottlenose dolphin               | <i>Tursiops truncatus</i>          | (Collares Barbosa et al. 2008)              |
|                                 |                                               | Atlantic spotted dolphins        | <i>Stenella frontalis</i>          | (Herzing and Johnson 1997)                  |
|                                 | Balaenopteridae<br>Baleen Whales              | Humpback whale                   | <i>Megaptera novaeangliae</i>      | (Weinrich and Kuhlberg 1991)                |
| Primates                        | Hominidae                                     | Chimpanzee                       | <i>Pan troglodytes</i>             | (Boesch and Boesch 1989)                    |
|                                 |                                               | Humans                           | <i>Homo sapiens</i>                | (Alvard and Nolin 2002)                     |
